# Supplementary material
Source: Springer Nature journal article supplement (https://www.springermedizin.de/resource/supplementary/12871_2013_350_MOESM3_ESM.pdf/9429190)

## Morphine equivalent dose (mg)

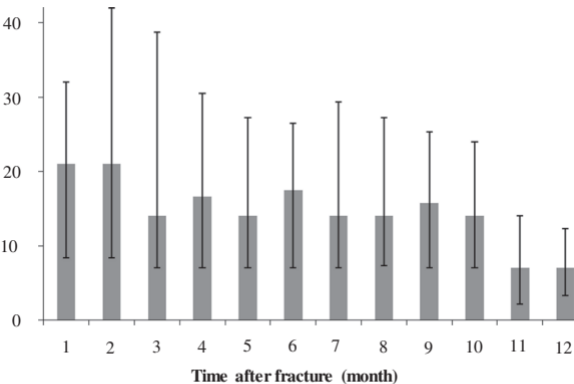

Number of patients:

547

68

45

30

32

21

22

20

14

20

14

9

Supplement: MOESM3 [file 9429190]
